# Supplementary material for: Utility of surveillance data for planning for dengue elimination in Yogyakarta, Indonesia: a scenario-tree modelling approach
Source: PubMed Central journal article supplement (PMC10660636; doi:10.1136/bmjgh-2023-013313), 2023-11-20

## Supplementary information

Supplementary Table 1: Summary description of multiple separate simulations conducted

| Simulation | Change from default simulation                                                                                                                                                                                                                              | New distribution parameters | Median system sensitivity (95% PI)* |
|------------|-------------------------------------------------------------------------------------------------------------------------------------------------------------------------------------------------------------------------------------------------------------|-----------------------------|-------------------------------------|
| 1          | Default parameters as described                                                                                                                                                                                                                             | No change                   | 0.131 (0.111 – 0.152)               |
| 2          | Probability of seeking healthcare at puskesmas participating in the enhanced dengue surveillance program reduced proportionally by 20%, reflecting a decrease in the number of puskesmas participating in enhanced surveillance due to resource constraints | pert(0.271, 0.339, 0.407)   | 0.105 (0.089 – 0.122)               |
| 3          | Probability of first seeking healthcare at hospital (i.e., without first presenting at puskesmas participating in the enhanced dengue surveillance) increased by 5% (absolute)                                                                              | pert(0.136, 0.194, 0.223)   | 0.132 (0.112 – 0.153)               |
| 4          | Probability of sampling at puskesmas participating in the enhanced dengue surveillance program increased, reflecting increased awareness of the dengue elimination goal amongst healthcare providers                                                        | pert(0.8, 0.9, 0.95)        | 0.142 (0.121 – 0.163)               |
| 5          | Probability of sampling at hospital increased, reflecting increased awareness of the dengue elimination goal amongst healthcare providers                                                                                                                   | pert(0.7, 0.8, 0.9)         | 0.138 (0.118 – 0.159)               |
| 6          | Probability of notification of a positive result at a hospital increased, reflecting increased awareness of the dengue elimination goal amongst healthcare providers                                                                                        | pert(0.9, 0.95, 0.98)       | 0.130 (0.110 – 0.151)               |
| 7          | Changes per simulations 3 – 6 combined in a single model                                                                                                                                                                                                    |                             | 0.162 (0.142 – 0.184)               |

Table notes: \*Assumes a probability of recurrence of local dengue transmission of 1% per month.

Supplementary Table 2: Unit sensitivities (USe) by age, gender, and type of health facility

| Risk stratum       | Median USe (5th-95th percentile) |                     |
|--------------------|----------------------------------|---------------------|
|                    | Puskesmas                        | Hospital            |
| Under 5_female     | 0.138 (0.118-0.159)              | 0.016 (0.012-0.022) |
| 5 to 14_female     | 0.123 (0.105-0.141)              | 0.015 (0.011-0.02)  |
| 15 to 29_female    | 0.108 (0.093-0.125)              | 0.013 (0.009-0.017) |
| 30 and over_female | 0.108 (0.093-0.125)              | 0.013 (0.009-0.017) |
| Under 5_male       | 0.138 (0.118-0.159)              | 0.016 (0.012-0.022) |
| 5 to 14_male       | 0.123 (0.105-0.141)              | 0.015 (0.011-0.02)  |
| 15 to 29_male      | 0.108 (0.093-0.125)              | 0.013 (0.009-0.017) |
| 30 and over_male   | 0.108 (0.093-0.125)              | 0.013 (0.009-0.017) |

Supplementary Figure 1: Median confidence of elimination over 60 months for seven alternative simulations and assuming a probability of recurrence of 1% per month.

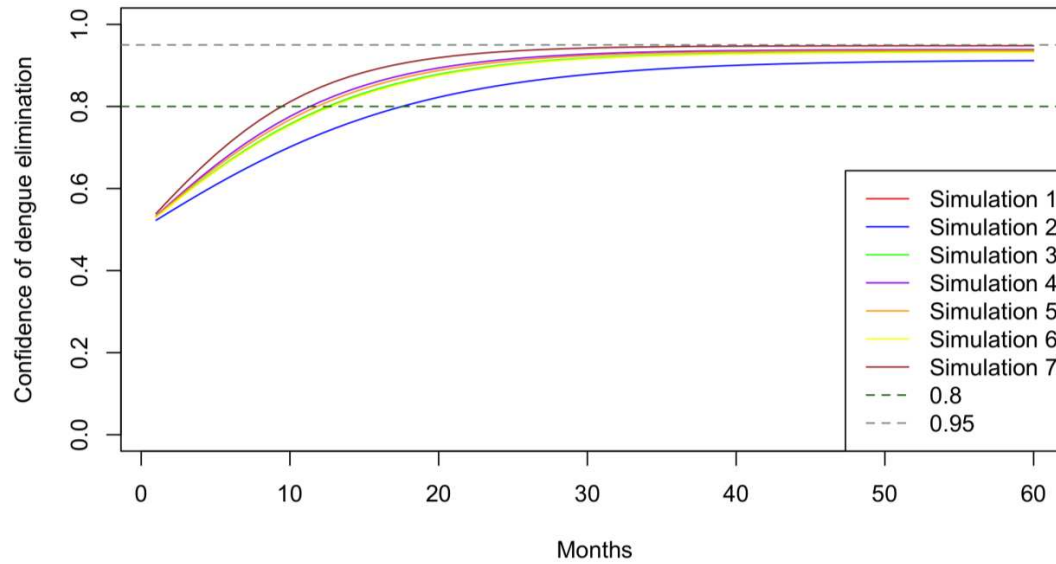

Supplement: bmjgh-2023-013313supp001.pdf [file bmjgh-2023-013313supp001.pdf]
